# Supplementary material for: Modification of dry/wet hybrid fabrication method for preparing a perovskite absorption layer on a PCBM electron transport layer
Source: Royal Society of Chemistry journal article supplement (doi:10.1039/c8ra08022d), 2018-01-01
Supplement: c8ra08022d1.pdf [file c8ra08022d1.pdf]

Supplementary Information

Modification of dry/wet hybrid fabrication method for preparing perovskite absorption  
layer on PCBM electron transport layer

Junta Kagae, Takaaki Yamanaka, Shun Takahashi, and Kenichi Yamashita\*

Faculty of Electrical Engineering and Electronics, Kyoto Institute of Technology, Matsugasaki,  
Sakyo-ku, Kyoto 606-8585, Japan

\*Corresponding author: yamasita@kit.ac.jp

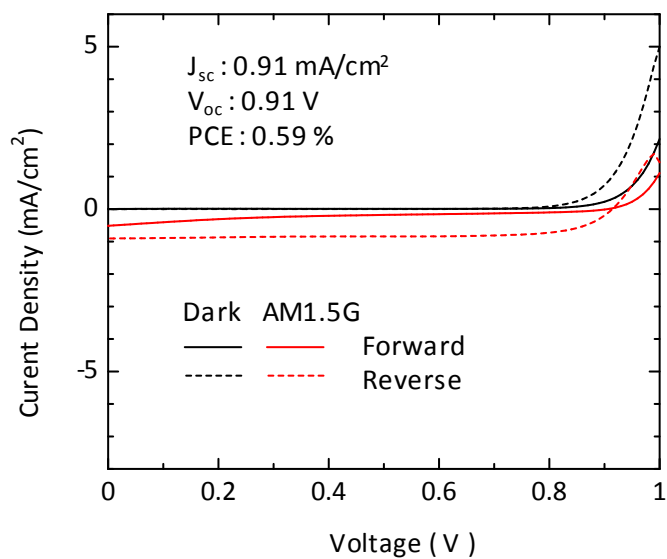

Figure S1 Current density – voltage curves of a photovoltaic device with a  $\text{MAPbI}_3$  absorption layer fabricated by spin coating of  $\text{PbI}_2$  on PCBM. The detailed fabrication conditions are the same with that described in the Experimental section in the main manuscript.

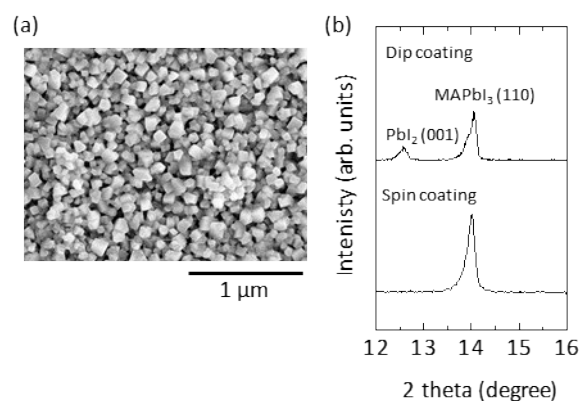

Figure S2 (a) SEM images of MAPbI<sub>3</sub> perovskite films synthesized with dip coating into MAI precursor solution. The PbI<sub>2</sub> film was prepared by vapor deposition method. (b) XRD patterns of MAPbI<sub>3</sub> film synthesized by dip coating and spin coating of MAI precursor solutions. The PbI<sub>2</sub> precursor layers were prepared by thermal evaporation.

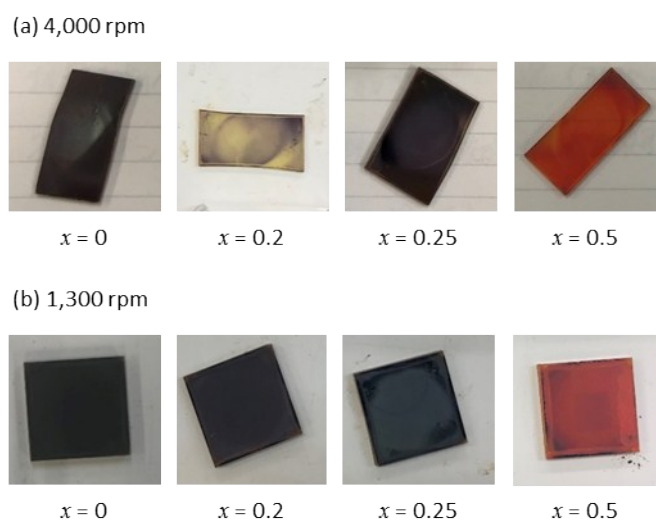

Figure S3 Photographs of FA<sub>x</sub>MA<sub>1-x</sub>PbI<sub>3</sub> mixed perovskite films with  $x = 0, 0.2, 0.25,$  and  $0.5$  prepared by spin coating at (a) 4,000 rpm and (b) 1,300 rpm on thermally evaporated PbI<sub>2</sub> precursor films.

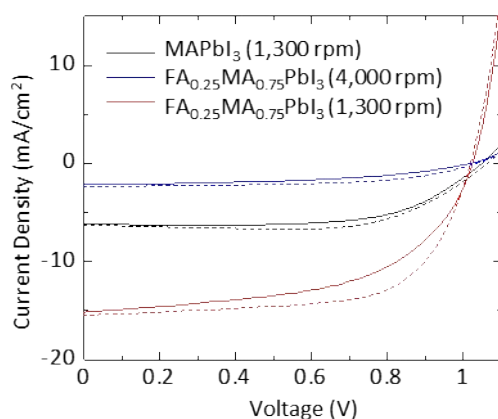

Figure S4 Example of  $J-V$  curves for photovoltaic devices with MAPbI<sub>3</sub> (black curves) and FA<sub>0.25</sub>MA<sub>0.75</sub>PbI<sub>3</sub> (blue and red lines) absorption layers under AM1.5G illumination. Solid and dashed curves exhibit characteristics at forward and reverse scans, respectively.

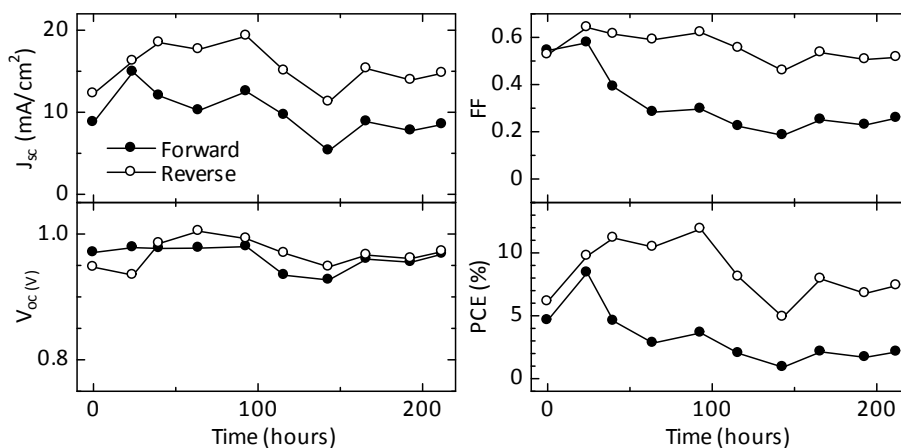

Figure S5 Stability test of photovoltaic device with FA<sub>0.25</sub>MA<sub>0.75</sub>PbI<sub>3</sub> absorption layer prepared by spin coating at 1,300 rpm. Temporal variations of the short-circuit current density  $J_{sc}$ , open-circuit voltage  $V_{oc}$ , filling factor FF, and power conversion efficiency PCE are shown. The sample was kept in a dark place with 25% humidity.
